1 **Title: Comparing faster evolving *rplB* and *rpsC* versus SSU rRNA for improved microbial**  
2 **community resolution**

3

4 **Authors:** Jiarong Guo<sup>a</sup>, James R. Cole<sup>a</sup>, C. Titus Brown<sup>b</sup>, James M. Tiedje<sup>a</sup>

5

6 **Author affiliation:**

7

8 <sup>a</sup>Center for Microbial Ecology, Michigan State University

9 <sup>b</sup>Department of Population Health and Reproduction, University of California, Davis

10

11 **Corresponding author:**

12 James M. Tiedje

13 [tiedjej@msu.edu](mailto:tiedjej@msu.edu)

14

15 **Author contributions:** J.G. performed the analyses under the supervision of J.M.T., C.T.B. and  
16 J.R.C.. All also helped with the analysis approaches and writing of the paper.

17

18

19

20

21

22

23 **Abstract:**

24            Amplicon sequencing of the SSU rRNA gene is standard for microbial ecology but has  
25 several drawbacks including limited resolving power for taxa below the level of genus and  
26 variable multiplicity presenting difficulties in quantifying different organisms. Many conserved  
27 protein-coding core genes are single copy and evolve faster than the SSU rRNA gene but their  
28 use has been precluded by the lack of universal primers for amplicon sequencing. Recent  
29 advances in gene targeted assembly methods for large shotgun metagenomes make their use  
30 feasible. To evaluate this approach, we compared the variation of two single copy ribosomal  
31 protein genes, *rplB* and *rpsC*, with the SSU rRNA gene for all completed bacterial genomes in  
32 NCBI RefSeq. As expected, among pairwise comparisons of all species that belong to the same  
33 genus, 94.9% and 91.0% of the pairs of *rplB* and *rpsC*, respectively, showed more variation than  
34 did their SSU rRNA sequences. To circumvent primer bias and lack of universal primer issues of  
35 amplicon methods, we used a gene targeted assembler, Xander, to assemble *rplB* and *rpsC* from  
36 shotgun metagenomic data. When tested on rhizosphere samples of three crops -- corn, an  
37 annual, and *Miscanthus* and switchgrass, both perennials -- both genes separated all three  
38 communities while SSU rRNA gene could only separate the annual from the two perennial  
39 communities in ordination analyses. Furthermore, the Xander assemblies of *rplB* and *rpsC*  
40 yielded significantly higher numbers of OTUs (alpha diversity) than SSU rRNA gene recovered  
41 from short reads and from amplicon data. These results confirm the better resolving ability of  
42 these faster evolving marker genes for comparative microbiome studies.

43

44 **Importance:**

45 High resolution marker genes are central to determining diversity of communities and  
46 differences between or among communities. Many ecologically determinative features occur at  
47 genetic levels not resolved by the relatively conserved SSU rRNA gene; hence marker genes are  
48 needed with finer community resolution. Further, if they were single copy, counting would be  
49 more accurate than for the variable copy SSU rRNA genes. The rapid advancement of shotgun  
50 sequencing and metagenome assembly has enabled us to avoid the need for and the inevitable  
51 bias of primers, to recover single-copy protein-coding genes directly from shotgun metagenomes.  
52 Targeting a few genes for assembly, like those coding for ribosomal proteins, samples more  
53 organisms and speeds the analysis over using whole genome assemblies for this purpose.

54

## 55 **Introduction:**

56 Shaped by 3.5 billion years of evolution, microorganisms are estimated to comprise up to one  
57 trillion species and the majority of genetic diversity in the biosphere (1). However, our  
58 understanding of this diversity is limited because of this huge number, and that the majority are  
59 yet to be cultured and their physiology or functions characterized. Since the pioneering work of  
60 Carl Woese in the late 1970s, the SSU rRNA gene has been the dominant marker used in  
61 microbial community structure analyses (2–5). While it has been extremely useful to advancing  
62 understanding of the microbial world, it does have important limitations, namely that it is highly  
63 conserved and that there are usually multiple copies and some with intra-genomic variations  
64 making this gene problematic for taxonomic identification at species and ecotypes levels and  
65 incapable of reflecting community distinctions at ecologically meaningful levels (6–8).

66 With the accelerated accumulation of microbial genomes in NCBI in recent years (9), whole  
67 genome-based comparison is now feasible and a more accurate method for species and strain

68 identification (9–15). However, whole genome-based comparison is computationally more  
69 expensive compared to marker gene comparison, and it is not yet possible to reliably obtain  
70 genome sequences of many members of natural microbial communities. Hence, marker gene  
71 analysis remains useful. Single copy protein coding housekeeping genes stand out as the best  
72 candidates. First, their single copy status provides more accurate species and strain counting,  
73 identification and OTU clustering than the SSU rRNA gene. Second, they are present in virtually  
74 all members of the three domains of life. Third, protein coding genes evolve faster than rRNA  
75 genes not only because rRNA genes are more conserved due to their critical role in ribosome  
76 function (16), but also because of the redundancy in the genetic code, especially at the third  
77 codon position (6).

78 Here, we evaluate two single copy protein coding genes, *rplB* (50S ribosomal large subunit  
79 protein L2), and *rpsC* (30S ribosomal small subunit protein S3) as potential housekeeping genes  
80 for phylogenetic markers for microbial community analyses. Earlier studies showed the potential  
81 of protein coding genes over SSU rRNA genes as higher resolution phylogenetic markers for  
82 microbial diversity analyses using both genomic data (111 genomes) and metagenomic data (< 6  
83 Gbp by Sanger sequencing) (6, 8). We revisited this comparison with the now much larger data  
84 set - all completed bacterial genomes (~4500 with one contig) and then tested the resolving  
85 power of these two genes versus SSU rRNA gene among different crop rhizospheres using large  
86 shotgun metagenomic data (~1TB). The novelty of our analyses is the application of gene  
87 targeted assembly to recover single copy protein coding genes from shotgun metagenomic data  
88 (17) and the use of *de novo* OTU-based diversity analyses, commonly used in microbial diversity  
89 analyses, rather than just taxonomic identification as previous studies (6, 8).

90

91 **Methods:**

92 Bacterial genome assembly information from NCBI

93 ([ftp://ftp.ncbi.nlm.nih.gov/genomes/refseq/bacteria/assembly\\_summ](ftp://ftp.ncbi.nlm.nih.gov/genomes/refseq/bacteria/assembly_summary.txt)

94 [ary.txt](ftp://ftp.ncbi.nlm.nih.gov/genomes/refseq/bacteria/assembly_summary.txt)) was used to construct the link to download each genome based on the instructions

95 described in this link

96 (<http://www.ncbi.nlm.nih.gov/genome/doc/ftpfaq/#allcomplete>).

97 Command line “wget” was then used to retrieve the genome sequences with links obtained from

98 the above step.

99 For extracting genes from genomes, the SSU rRNA gene HMM (Hidden Markov Model)

100 from SSUsearch (18) was used to recover rRNA genes. Aligned *rplB* and *rpsC* nucleotide

101 sequences of the “training set” retrieved from the RDP FunGene database (19) were used to build

102 the HMM models using hmmbuild command in HMMER (version 3.1b2) (20). The nhmmer

103 command in HMMER was then used to identify SSU rRNA, *rplB* and *rpsC* sequences from

104 bacteria genomes obtained from NCBI using score cutoff (-T) of 60. Next, nhmmer hits of least

105 90% of the length of the HMM model were accepted as the target gene. For the purpose of

106 comparing SSU rRNA and *rplB* and *rpsC* gene distances, one copy of the SSU rRNA gene was

107 randomly picked from each genome. Pairwise comparison among gene sequences was done

108 using vsearch (version 1.1.3) with “--allpairs\_global --acceptall” (21). Three species of

109 environmental interest, *Rhizobium leguminosarum*, *Pseudomonas putida* and *Escherichia coli*,

110 were chosen for closer comparison of *rplB* and *rpsC* pairwise distances and SSU rRNA gene

111 distances.

112 The shotgun data are from DNA from seven field replicates of rhizosphere samples of three

113 biofuel crops: corn (C) *Zea mays*, switchgrass (S) *Panicum virgatum*, and *Miscanthus x giganteus*

114 (M) that had been grown for 5 years. Shotgun sequence data for the 21 samples were downloaded  
115 from the JGI web portal (<http://genome.jgi.doe.gov/>); JGI Project IDs are listed in Table S1. Raw  
116 reads were quality trimmed using fastq-mcf in EA-Utils (version 1.04.662)  
117 (<http://code.google.com/p/ea-utils>) “-l 50 -q 30 -w 4 -k 0 -x 0 --max-ns 0 -X”. Overlapping  
118 paired-end reads were merged by FLASH (version 1.2.7) (22) with “-m 10 -M 120 -x 0.20 -r 140  
119 -f 250 -s 25” described in (18).

120 SSU rRNA gene amplicon data (JGI project ID: 1025756) from the same DNA used for  
121 shotgun sequence were trimmed the same way as shotgun data (described above). Paired ends  
122 were joined by FLASH (-m 10 -M 150 -x 0.08 -p 33 -r 200 -f 300 -s 25) (22) and primer  
123 sequences were removed by cutadapt (-f fasta --discard-untrimmed) (23). For community  
124 analyses, the open reference OTU picking method in QIIME was used for clustering and Bray-  
125 Curtis index was used for beta-diversity index (24).

126 For SSU rRNA gene analyses with shotgun data, SSU rRNA gene fragments and those  
127 aligned to the V4 region (*E. coli* position: 577 - 727) of each sample were identified using the  
128 SSUsearch pipeline (18) and clustered using RDP’s McClust tool (25) at a distance of 0.05 and  
129 minimal overlap of 25 bp, following the tutorial in SSUsearch ([http://microbial-ecology-  
130 protocols.readthedocs.io/en/latest/SSUsearch/overview.html](http://microbial-ecology-protocols.readthedocs.io/en/latest/SSUsearch/overview.html)).

131 Both *rplB* and *rpsC* sequences were assembled using Xander with  
132 “MAX\_JVM\_HEAP=500G, FILTER\_SIZE=40, K\_SIZE=45, genes = *rplB* and *rpsC*,  
133 MIN\_LENGTH=150, THREADS=9” (17). Data for each crop were assembled separately. The  
134 assembled *rplB* or *rpsC* sequences (nucleotide and protein) from the three crops were pooled and  
135 clustered using RDP’s McClust tool (25). For each gene, a table of OTU counts of each sample  
136 was made based on mean k-mer coverage of the representative sequence of each OTU (provided  
137 in “\*\_coverage.txt” output file from Xander). Further, diversity analyses were done with the

138 vegan package in R using functions “rda” for ordination and “diversity” for Shannon diversity  
139 index, respectively, from the OTU (count) tables. An implementation of this pipeline is publicly  
140 available at <https://doi.org/10.5281/zenodo.1438073>.

141 To assess how many potential target gene reads of *rplB* and *rpsC* were assembled by Xander,  
142 we did a six-frame translation of the short reads (nucleotide sequences) into protein sequences by  
143 transeq in EMBOSS tool (26). We then searched HMMs against the protein sequences and the  
144 hits with bit score > 40 (e-value <  $6.2 * 10^{-6}$ ) were treated as reads from the target gene.  
145 Meanwhile, “\*\_match\_reads.fa”, a collection of reads that share a k-mer (k=45) with assembled  
146 sequences, output from Xander, provided the reads assembled by Xander. Then we compared the  
147 fold coverage of reads found by hmmsearch and reads used by Xander, by estimating fold  
148 coverage of each read with median kmer coverage using khmer package (27, 28).

#### 149 **Results:**

150 A total of 4,457 of complete bacteria genomes defined as one sequence were downloaded.  
151 SSU rRNA gene copy number ranged from 1 to 16 with a mean of 4 and 99.9% of genomes have  
152 single copies of *rplB* and *rpsC* (Table S2). Both of these genes were present in 4,440 of the  
153 complete genomes. When evaluating intra-genomic variation among copies of SSU rRNA genes  
154 in completed genomes of *R. leguminosarum*, *P. putida* and *E. coli*, *E. coli* had the largest  
155 variation with a minimum of 95.4% identity (Fig. S1). For the pairwise comparison between  
156 genomes, one copy of each gene was randomly picked as a representative for genomes with  
157 multiple copies.

158 For the selected taxa, Rhizobiales, Pseudomonadales, *Rhizobium*, and *Pseudomonas*, *rplB*  
159 and *rpsC* had similar variations and both had larger variation among the genomes than SSU  
160 rRNA genes within their corresponding order (among genera), and genus (among species) (Fig. 1

161 and 2). When comparing all species of completed genomes that belong to the same genus, we  
162 found SSU rRNA gene has an identity range of 63.2% to 100.0% and a median of 95.2%, *rplB*  
163 has an identity range of 43.2% to 100.0% and a median of 87.2%, *rpsC* has an identity range of  
164 46.0% to 100.0% and a median of 90.3%. Between *rplB* and SSU rRNA gene, 88,993 pairs  
165 (94.9% of total) has larger variation in *rplB*, 3,573 pairs have larger variation in SSU rRNA gene,  
166 and 1,167 pairs have the same variation (Fig. 3A); 77,885 pairs (91.0% of total) has larger  
167 variation in *rpsC*, 6,074 pairs have larger variation in SSU rRNA gene, and 1,622 pairs have the  
168 same variation (Fig. 3B); 54,755 pairs (63.7%) has larger variation in *rplB*, 28,393 pairs have  
169 larger variation in *rpsC* gene, and 2,808 pairs have the same variation for *rplB* and *rpsC* (Fig.  
170 3C).

171 We compared SSU rRNA genes with *rplB* and *rpsC* to test the ability of shotgun data to  
172 resolve community differences among plant rhizospheres. We chose these two genes as they had  
173 a suitable length for Xander assembly, were long enough for resolving power, and had HMMs  
174 that were both specific and sensitive for fragment recovery due to their uniqueness in sequence as  
175 parts of the ribosome, and both have been used as phylogenetic marker in other shotgun  
176 metagenomic studies (29, 30). On average, 0.04% of total reads were identified as SSU rRNA  
177 gene fragments and 0.004% of total reads aligned to the 150 bp of V4 region of the gene with  
178 SSUsearch (18). Another 0.01% and 0.008% of total reads were identified as *rplB* and *rpsC*,  
179 respectively, by Xander (Table S3). To test the sensitivity of Xander, we found that the number  
180 of potential *rplB* and *rpsC* reads assembled were 49.5% and 47.9%, respectively, of those defined  
181 by hmmsearch with bit score cutoff of 40 (Table S4) and have much higher fold coverage than  
182 the rest of reads (excluding shared reads) in hmmsearch hits (Figure S2).

183 Beta diversity analyses of all three genes showed that the rhizosphere communities of the  
184 annual crop, corn, were different from those of the two perennial grasses, *Miscanthus* and



185 switchgrass, but only *rplB* and *rpsC* distinguished the communities of the two perennial grasses  
186 (Fig. 4). This was true whether the analysis was at the nucleotide or protein level. The alpha  
187 diversity of the corn rhizosphere communities was significantly lower than those of *Miscanthus*  
188 and switchgrass rhizospheres by all three measures except for Chao1 index with *rpsC* and SSU  
189 rRNA gene (Fig. 5). When comparing among genes, the numbers of OTUs from *rplB* and *rpsC*  
190 are also significantly higher than SSU rRNA gene (Fig. 5). Since SSUsearch returns shorter  
191 fragments than Xander assembled genes, we also evaluated whether the longer fragments of SSU  
192 rRNA from amplicon data ~ 250 to 300 bp, could distinguish the two perennial grass  
193 communities, and they could not (Fig. 3E).

194

## 195 **Discussion:**

196 We confirmed the advantages of *rplB* and *rpsC* over the SSU rRNA gene as a more resolving  
197 phylogenetic marker using updated large genomic data (~4500 complete genomes) (Fig. 1, 2 and  
198 3). We also demonstrated that *rplB* and *rpsC* can be assembled from large shotgun metagenomes  
199 and showed that they provided higher community resolution by separating *Miscanthus* and  
200 switchgrass rhizosphere samples while the SSU rRNA gene did not (Fig. 4). The two perennial  
201 grasses would be expected to have more similar microbiome than the annual since the latter is re-  
202 established each year while the fibrous perennial grass roots are more similar and not physically  
203 disturbed annually and thus do not have full regrowth at a new random site each year.

204 In large genomic data analyses, *rplB* and *rpsC* show advantages in following three aspects:

205 First, SSU rRNA gene, a multiple copy gene, poses difficulties for interpreting species  
206 abundance, while *rplB* and *rpsC* do not have the same issue as it is single copy genes in > 99.9%  
207 of complete genomes (Table S2). Additionally, variations among multiple SSU copies can cause  
208 multiple OTUs (sequence clusters) from the same species (Figure S1) and thus leads to

209 overestimation of species richness (31). Since a single copy of the *rplB* and *rpsC* genes is  
210 contained in every cell in a community, the relative abundance of *rplB* and *rpsC* gene sequences  
211 provides a reference for estimating the fraction of organisms possessing other genes.

212 Second, *rplB* and *rpsC* are better able to differentiate closely related species based on their  
213 lower sequence similarities compared to the SSU rRNA gene in pairwise comparisons among  
214 genomes (Fig. 1, 2, and 3). This is consistent with the crucial role SSU rRNA plays in translation  
215 (ensuring translation accuracy) (16), also confirmed by another study showing SSU rRNA genes  
216 (along with LSU rRNA genes, tRNA and ABC transporter genes) to be the most conserved genes  
217 (32).

218 Third, SSU rRNA genes in genomes are also more prone to assembly errors (chimera) than  
219 single copy genes due to their higher overall nucleotide identity and the presence of highly  
220 conserved regions interspersed in SSU rRNA genes. Note that these erroneous sequences might  
221 be further collected by databases and used as references for taxonomy, alignment, and chimera  
222 detection, and thus have an impact on common microbial ecology diversity analyses. Switching  
223 to a single copy gene that is less prone to assembly error can mitigate the above problem.

224 Finally, this method provides for higher resolution community diversity analyses in large  
225 shotgun metagenomes, leveraging a scalable gene targeted assembler, Xander. Assembly is  
226 desirable for short read data to correctly identify the gene and provide enough length for  
227 resolving power, a major objective in ecology studies. Assembly misses the rarer species that do  
228 not have enough sequencing depth in metagenomes, confirmed by the higher fold coverage of  
229 reads used in assemblies compared to the other reads in hmmsearch hits (Fig. S2). We did find  
230 that the number of reads used in assemblies are about half of the reads identified as the targeted  
231 genes by hmmsearch (Table S4). The hmmsearch though could also have recovered some false  
232 positives due to mistaken short-read identification and thus overestimated the total gene number.

233 However, *rplB* and *rpsC* yield significantly higher alpha diversity (Fig. 5) than SSU rRNA gene  
234 despite missing rare members. Thus they reveal more diversity among abundant members than  
235 SSU rRNA gene, which offsets and exceeds the diversity of the rare members that are not  
236 assembled, further confirming their higher resolution.

237 We choose two protein coding genes to be sure our results were not gene specific, and both  
238 gave very similar results at both the nucleotide and protein levels. At least from extensive  
239 completed genomes, most of these two genes are single copy making quantitative (ratio)  
240 comparisons with other genes more consistent. For future use, *rplB* might have slight advantage  
241 over *rpsC* since it is longer, about 830 bp on average vs 660 bp of *rpsC*, providing a bit more  
242 resolving power, which is consistent with results in genome comparisons showing *rplB* has lower  
243 median sequence identity than *rpsC* (Fig 3).

244 It is of course possible to find in reference databases the best match to the assembled  
245 sequence of these marker genes and potentially have finer taxonomic resolution than provided by  
246 SSU rRNA. But, the reference database is only from sequenced genomes and hence is very  
247 unbalanced and incomplete compared to 16S rRNA databases (17) so this use is not generally  
248 beneficial at this time.

249 Although sequencing depth needed varies depending on community diversity, we estimate it  
250 based on our rhizosphere soil samples as a practical guide. The reads from *rplB* are around 0.01%  
251 of total (Table S3). Assuming a fold coverage of 3000 of *rplB* for each sample, to be comparable  
252 to 3000 amplicons in planning amplicon-based studies, one needs about 25 Gbp ( $3000 * 830 /$   
253  $0.01\%$ ) of shotgun metagenome (830 bp is the average gene length of *rplB*). The major  
254 requirement for using this method beyond sufficient shotgun sequence depth is an access to a  
255 high performance computer since large memory (> 250 Gb recommended for soil samples) is  
256 needed to run Xander.

257

258 **Conclusion:**

259           We demonstrated that *rplB* and *rpsC*, single copy protein coding genes can provide finer  
260 resolution of taxa and hence better distinguish among communities than the more commonly  
261 used SSU rRNA gene and also provide finer scale *de novo* (OTU) diversity analysis. This method  
262 does require shotgun sequence of sufficient depth, so is currently more costly than amplicon  
263 based analyses, but as sequencing costs decline, capacity and access increase, read length grows,  
264 and genome reference databases grow, single copy protein coding genes such *rplB* and *rpsC* have  
265 the potential to complement or even replace the SSU rRNA gene as a phylogenetic marker and  
266 better reflect ecology of communities.

267

268 **Acknowledgement:**

269           We thank Ribosomal Database Project (RDP), Institute for Cyber-Enabled Research  
270 (iCER) and High Performance Computing Center (HPCC) at Michigan State University for  
271 technical support. Support for this research was provided by the U.S. Department of Energy,  
272 Office of Science, Program of Biological and Environmental Research (Awards DE-FC02-  
273 07ER64494, DE-FG02-99ER62848 and DE-SC0010715), and by the National Science  
274 Foundation Long-term Ecological Research Program (DEB 1637653) at the Kellogg Biological  
275 Station, and by Michigan State University AgBioResearch.

276

277

278

279

280

281

282

283

284

285

286

287 **References:**

288

289 1. Locey KJ, Lennon JT. 2016. Scaling laws predict global microbial diversity. Proc Natl Acad  
290 Sci USA 113:5970–5975.

291 2. Woese CR, Fox GE. 1977. Phylogenetic structure of the prokaryotic domain: the primary  
292 kingdoms. Proc Natl Acad Sci USA 74:5088–5090.

293 3. Lane DJ, Pace B, Olsen GJ, Stahl DA, Sogin ML, Pace NR. 1985. Rapid determination of  
294 16S ribosomal RNA sequences for phylogenetic analyses. Proc Natl Acad Sci USA 82:6955–  
295 6959.

296 4. Huse SM, Dethlefsen L, Huber JA, Mark Welch D, Welch DM, Relman DA, Sogin ML.  
297 2008. Exploring microbial diversity and taxonomy using SSU rRNA hypervariable tag  
298 sequencing. PLoS Genet 4:e1000255.

299 5. Caporaso JG, Lauber CL, Walters WA, Berg-Lyons D, Huntley J, Fierer N, Owens SM,  
300 Betley J, Fraser L, Bauer M, Gormley N, Gilbert JA, Smith G, Knight R. 2012. Ultra-high-

- 301 throughput microbial community analysis on the Illumina HiSeq and MiSeq platforms. *ISME*  
302 *J* 6:1621–1624.
- 303 6. Case RJ, Boucher Y, Dahllorf I, Holmstrom C, Doolittle WF, Kjelleberg S. 2007. Use of 16S  
304 rRNA and rpoB genes as molecular markers for microbial ecology studies. *Appl Env*  
305 *Microbiol* 73:278–288.
- 306 7. Wu M, Eisen JA. 2008. A simple, fast, and accurate method of phylogenomic inference.  
307 *Genome Biol* 9:R151.
- 308 8. Roux S, Enault F, Bronner G, Debroas D. 2011. Comparison of 16S rRNA and protein-  
309 coding genes as molecular markers for assessing microbial diversity (Bacteria and Archaea)  
310 in ecosystems. *FEMS Microbiol Ecol* 78:617–628.
- 311 9. Land M, Hauser L, Jun SR, Nookaew I, Leuze MR, Ahn TH, Karpinets T, Lund O, Kora G,  
312 Wassenaar T, Poudel S, Ussery DW. 2015. Insights from 20 years of bacterial genome  
313 sequencing. *Funct Integr Genomics* 15:141–161.
- 314 10. Goris J, Konstantinidis KT, Klappenbach JA, Coenye T, Vandamme P, Tiedje JM. 2007.  
315 DNA-DNA hybridization values and their relationship to whole-genome sequence  
316 similarities. *Int J Syst Evol Microbiol* 57:81–91.
- 317 11. Luo C, Walk ST, Gordon DM, Feldgarden M, Tiedje JM, Konstantinidis KT. 2011. Genome  
318 sequencing of environmental *Escherichia coli* expands understanding of the ecology and  
319 speciation of the model bacterial species. *Proc Natl Acad Sci USA* 108:7200–7205.

- 320 12. Varghese NJ, Mukherjee S, Ivanova N, Konstantinidis KT, Mavrommatis K, Kyrpides NC,  
321 Pati A. 2015. Microbial species delineation using whole genome sequences. *Nucleic Acids*  
322 *Res* 43:6761–6771.
- 323 13. Rodriguez-R LM, Castro JC, Kyrpides NC, Cole JR, Tiedje JM, Konstantinidis KT. 2018.  
324 How Much Do rRNA Gene Surveys Underestimate Extant Bacterial Diversity? *Appl Environ*  
325 *Microbiol* 84:e00014-18.
- 326 14. Scortichini M, Marcelletti S, Ferrante P, Firrao G. 2013. A Genomic Redefinition of  
327 *Pseudomonas avellanae* species. *PLOS ONE* 8:e75794.
- 328 15. Rodriguez-R LM, Gunturu S, Harvey WT, Rosselló-Mora R, Tiedje JM, Cole JR,  
329 Konstantinidis KT. 2018. The Microbial Genomes Atlas (MiGA) webserver: taxonomic and  
330 gene diversity analysis of Archaea and Bacteria at the whole genome level. *Nucleic Acids*  
331 *Res* 46:W282–W288.
- 332 16. Carter AP, Clemons WM, Brodersen DE, Morgan-Warren RJ, Wimberly BT, Ramakrishnan  
333 V. 2000. Functional insights from the structure of the 30S ribosomal subunit and its  
334 interactions with antibiotics. *Nature* 407:340–348.
- 335 17. Wang Q, Fish JA, Gilman M, Sun Y, Brown CT, Tiedje JM, Cole JR. 2015. Xander:  
336 employing a novel method for efficient gene-targeted metagenomic assembly. *Microbiome*  
337 3:32.
- 338 18. Guo J, Cole JR, Zhang Q, Brown CT, Tiedje JM. 2015. Microbial community analysis with  
339 ribosomal gene fragments from shotgun metagenomes. *Appl Environ Microbiol* AEM.02772-  
340 15.

- 341 19. Fish JA, Chai B, Wang Q, Sun Y, Brown CT, Tiedje JM, Cole JR. 2013. FunGene: the  
342 functional gene pipeline and repository. *Front Microbiol* 4.
- 343 20. Eddy SR. 2009. A new generation of homology search tools based on probabilistic inference.  
344 *Genome Inf* 23:205–211.
- 345 21. Rognes T, Flouri T, Nichols B, Quince C, Mahé F. 2016. VSEARCH: a versatile open source  
346 tool for metagenomics. *PeerJ* 4:e2584.
- 347 22. Magoc T, Salzberg SL. 2011. FLASH: fast length adjustment of short reads to improve  
348 genome assemblies. *Bioinformatics* 27:2957–2963.
- 349 23. Martin M. 2011. Cutadapt removes adapter sequences from high-throughput sequencing  
350 reads. *EMBnet.journal* 17:10–12.
- 351 24. Kuczynski J, Stombaugh J, Walters WA, Gonzalez A, Caporaso JG, Knight R. 2012. Using  
352 QIIME to analyze 16S rRNA gene sequences from microbial communities. *Curr Protoc*  
353 *Microbiol* Chapter 1:Unit 1E.5.
- 354 25. Cole JR, Wang Q, Fish JA, Chai B, McGarrell DM, Sun Y, Brown CT, Porras-Alfaro A,  
355 Kuske CR, Tiedje JM. 2014. Ribosomal Database Project: data and tools for high throughput  
356 rRNA analysis. *Nucleic Acids Res* 42:D633–642.
- 357 26. Rice P, Longden I, Bleasby A. 2000. EMBOSS: The European Molecular Biology Open  
358 Software Suite. *Trends Genet* 16:276–277.
- 359 27. Crusoe MR, Alameldin HF, Awad S, Boucher E, Caldwell A, Cartwright R, Charbonneau A,  
360 Constantinides B, Edvenson G, Fay S, Fenton J, Fenzl T, Fish J, Garcia-Gutierrez L, Garland



- 361 P, Gluck J, González I, Guermond S, Guo J, Gupta A, Herr JR, Howe A, Hyer A, Härpfer A,  
362 Irber L, Kidd R, Lin D, Lippi J, Mansour T, McA’Nulty P, McDonald E, Mizzi J, Murray  
363 KD, Nahum JR, Nanlohy K, Nederbragt AJ, Ortiz-Zuazaga H, Ory J, Pell J, Pepe-Ranney C,  
364 Russ ZN, Schwarz E, Scott C, Seaman J, Sievert S, Simpson J, Skennerton CT, Spencer J,  
365 Srinivasan R, Standage D, Stapleton JA, Steinman SR, Stein J, Taylor B, Trimble W,  
366 Wiencko HL, Wright M, Wyss B, Zhang Q, zyme en, Brown CT. 2015. The khmer software  
367 package: enabling efficient nucleotide sequence analysis. F1000Research.
- 368 28. Brown CT, Howe A, Zhang Q, Pyrkosz AB, Brom TH. 2012. A Reference-Free Algorithm  
369 for Computational Normalization of Shotgun Sequencing Data. ArXiv12034802 Q-Bio.
- 370 29. Sharon I, Kertesz M, Hug LA, Pushkarev D, Blauwkamp TA, Castelle CJ, Amirebrahimi M,  
371 Thomas BC, Burstein D, Tringe SG, Williams KH, Banfield JF. 2015. Accurate, multi-kb  
372 reads resolve complex populations and detect rare microorganisms. *Genome Res* 25:534–  
373 543.
- 374 30. Hug LA, Castelle CJ, Wrighton KC, Thomas BC, Sharon I, Frischkorn KR, Williams KH,  
375 Tringe SG, Banfield JF. 2013. Community genomic analyses constrain the distribution of  
376 metabolic traits across the Chloroflexi phylum and indicate roles in sediment carbon cycling.  
377 *Microbiome* 1:22.
- 378 31. Sun DL, Jiang X, Wu QL, Zhou NY. 2013. Intragenomic heterogeneity of 16S rRNA genes  
379 causes overestimation of prokaryotic diversity. *Appl Env Microbiol* 79:5962–5969.

380 32. Isenbarger TA, Carr CE, Johnson SS, Finney M, Church GM, Gilbert W, Zuber MT, Ruvkun  
381 G. 2008. The most conserved genome segments for life detection on Earth and other planets.  
382 *Orig Life Evol Biosph* 38:517–533.

383

384

385

386

387

388

389

390

391

392

### 393 **Figures**

394 Figure 1: Pairwise comparisons among all genomes of Rhizobiales (panels A, C, E) and of all  
395 *Rhizobium* (panels B, D, F) using the SSU rRNA gene, *rplB* and *rpsC*. SSU rRNA gene identities  
396 are higher than *rplB* and *rpsC*, and *rplB* and *rpsC* have similar sequence identities in most  
397 genome pairs. The dashed line is  $y = x$ . Data below  $y=x$  line indicate the gene on X axis is more  
398 conserved. The dot size indicates the number of pairwise comparisons with those values.

399

400

401 Figure 2: Pairwise comparison among all genomes of Pseudomonadales (panels A, C, E) and of  
402 all *Pseudomonas* (panels B, D, F) using the SSU rRNA gene, *rplB* and *rpsC*. SSU rRNA gene  
403 identities are higher than *rplB* and *rpsC* in most genome pairs, and *rplB* and *rpsC* have similar  
404 sequence identities. The dashed line is  $y = x$ . Data below  $y=x$  line indicate gene on X axis is  
405 more conserved. The dot size indicates the number of pairwise comparisons with those values.

406

407

408 Figure 3: Pairwise comparison among all completed genomes of species in the same genus using  
409 the SSU rRNA gene, *rplB*, and *rpsC*. SSU rRNA gene identities are larger than *rplB* in most  
410 genomes. The diagonal dashed line is  $y = x$  and data below the line indicates the gene on X axis  
411 is more conserved. The dot intensity is the number of comparisons with those values. Subplot A,  
412 B, and C are comparisons of *rplB* and SSU rRNA gene (93,733 pairwise comparisons), *rpsC* and  
413 SSU rRNA gene (85,581 pairwise comparisons), *rplB* and *rpsC* (85,956 pairwise comparisons).

414

415

416 Figure 4: Comparison of the SSU rRNA gene, *rpsC* and *rplB* in beta diversity analyses  
417 (ordination) using large soil metagenome sequences from seven field replicates. All genes show  
418 that the microbial community of the corn (C) rhizosphere is significantly different from those of  
419 *Miscanthus* (M) and switchgrass (S) while *rplB* and *rpsC* at both the nucleotide (n) and protein  
420 (p) levels separate microbial communities of *Miscanthus* and switchgrass. The SSU rRNA gene  
421 does not separate *Miscanthus* and switchgrass with either shotgun (SSU.sg) or amplicon  
422 (SSU.am) data. “\*\*\*” indicates  $p < 0.01$  in PERMANOVA test.

423

424

425 Figure 5: Comparison of the SSU rRNA gene, *rplB*, and *rpsC* in alpha diversity analyses (Chao1,  
426 Shannon, and OTU number by protein, “\_p” and nucleotide, “\_n”) using large soil metagenome  
427 sequence. All genes show that the microbial community of the corn (C) rhizosphere has  
428 significantly less alpha diversity than those of *Miscanthus* (M) and switchgrass (S) except for  
429 *rpsC* and SSU rRNA gene with Chao1 index ( $p < 0.01$ ). Wilcoxon test was used to compare  
430 SSU\_sg against each of the other genes including *rplB\_n*, *rplB\_p*, *rpsC\_n*, *rpsC\_p* and SSU\_am.  
431 For Chao1 index, *rplB\_n* and *rpsC\_n* show significantly higher abundance than SSU\_sg in  
432 *Miscanthus* and switchgrass; For Shannon index and OTU number, *rplB\_n* and *rpsC\_n* show  
433 significantly higher abundance than SSU\_sg in all three crops (“\*\*\*\*” is  $p < 0.001$ , “\*\*” is  $p <$   
434  $0.01$ , “\*” is  $p < 0.05$ , “ns” is  $p > 0.05$ ).

435

436

## Figures

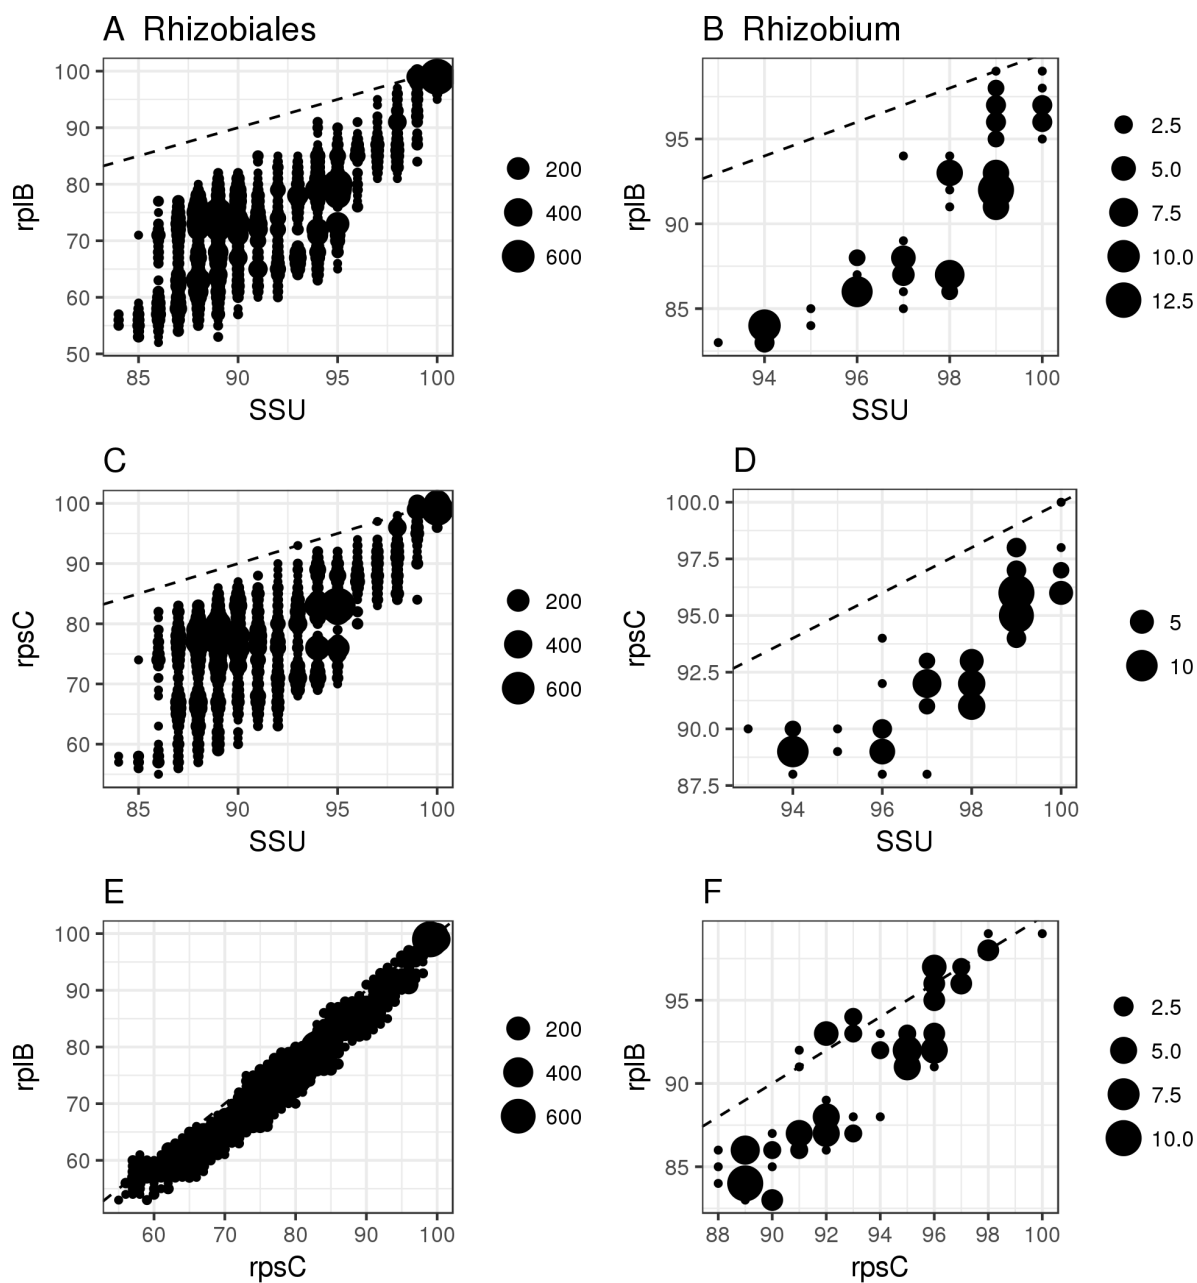

Figure 1: Pairwise comparisons among all genomes of Rhizobiales (panels A, C, E) and of all *Rhizobium* (panels B, D, F) using the SSU rRNA gene, *rplB* and *rpsC*. SSU rRNA gene identities are higher than *rplB* and *rpsC*, and *rplB* and *rpsC* have similar sequence identities in most genome pairs. The dashed line is  $y = x$ . Data below  $y=x$  line indicate the gene on X axis is more conserved. The dot size indicates the number of pairwise comparisons with those values.

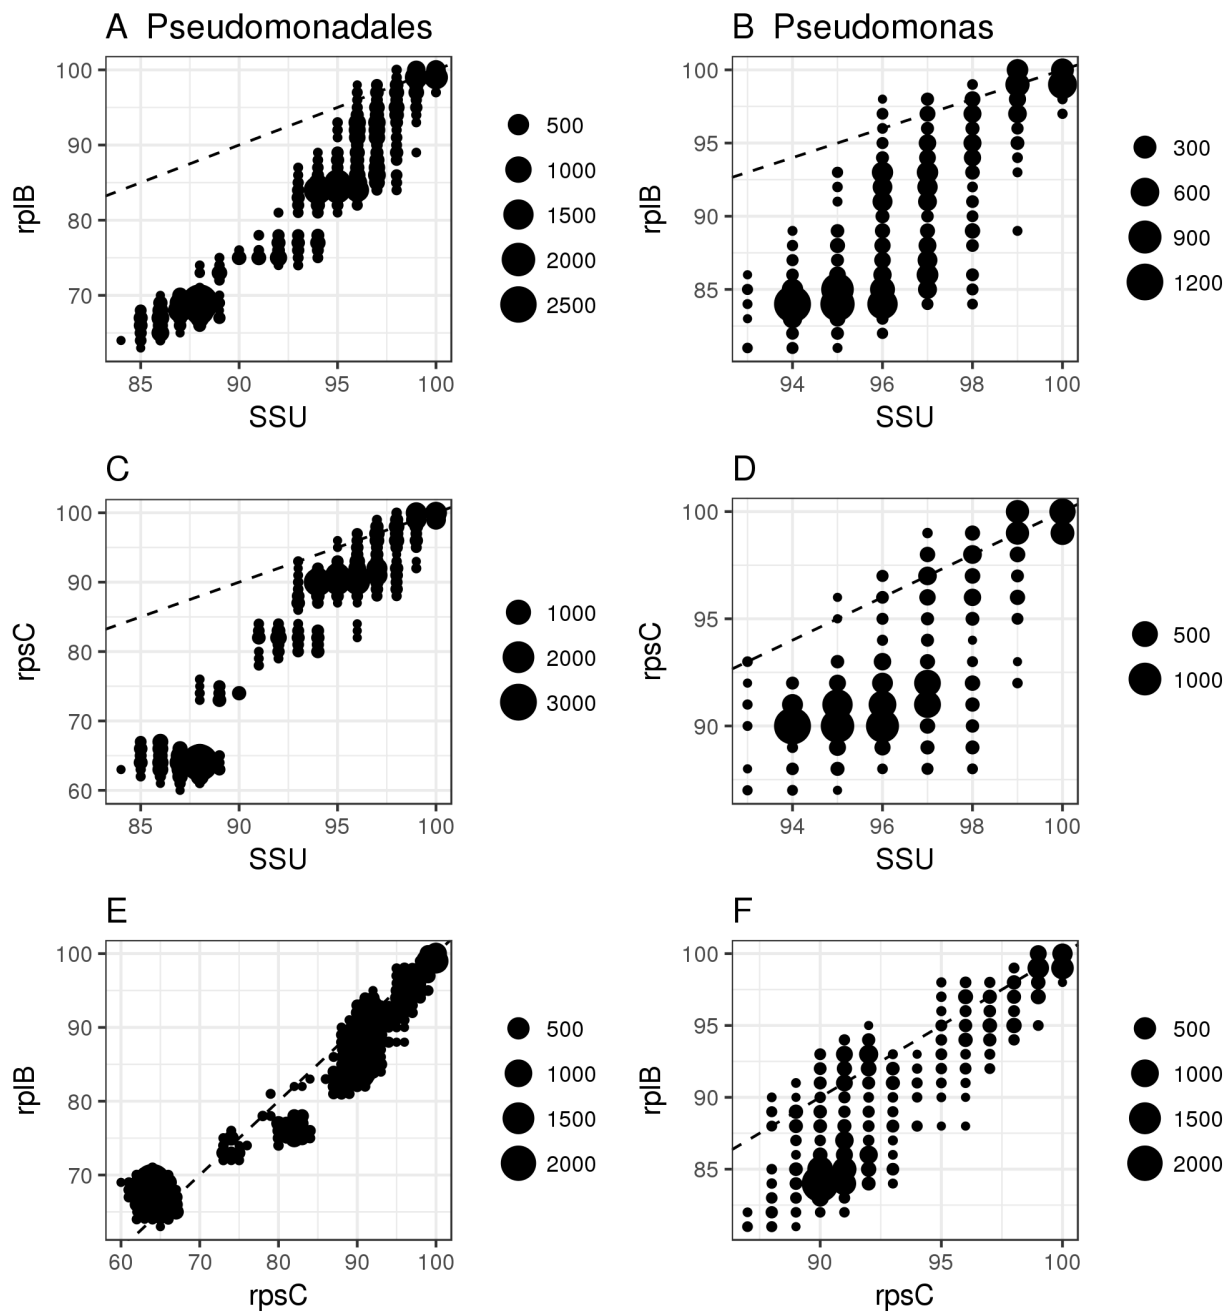

Figure 2: Pairwise comparison among all genomes of Pseudomonadales (panels A, C, E) and of all *Pseudomonas* (panels B, D, F) using the SSU rRNA gene, *rplB* and *rpsC*. SSU rRNA gene identities are higher than *rplB* and *rpsC* in most genome pairs, and *rplB* and *rpsC* have similar sequence identities. The dashed line is  $y = x$ . Data below  $y=x$  line indicate gene on X axis is more conserved. The dot size indicates the number of pairwise comparisons with those values.



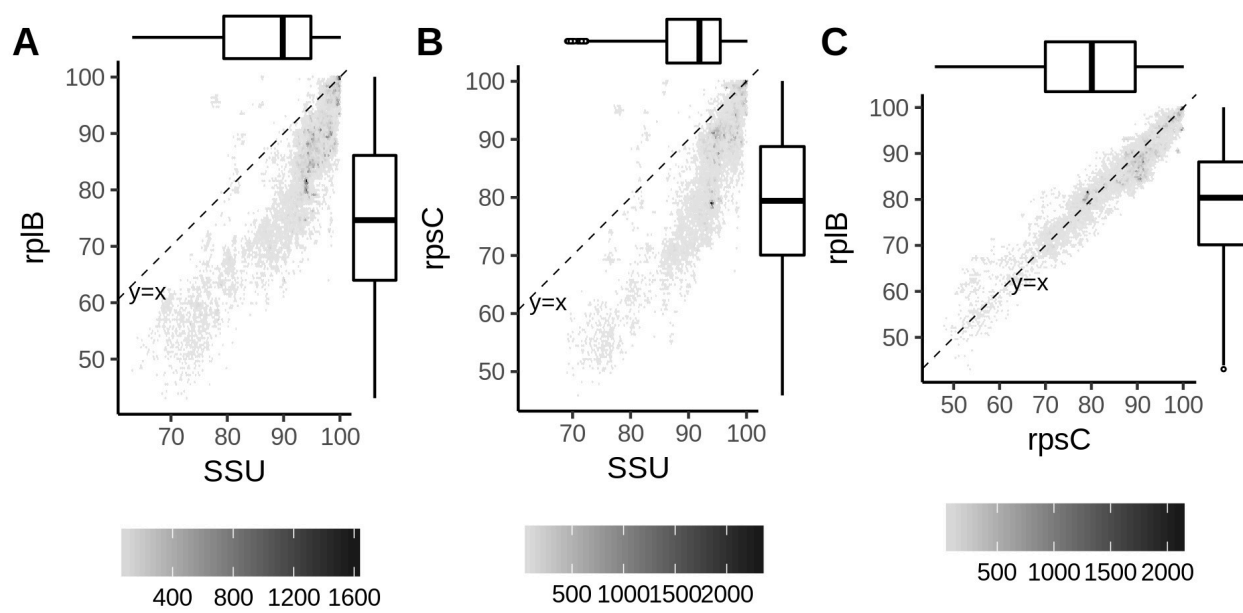

Figure 3: Pairwise comparison among all completed genomes of species in the same genus using the SSU rRNA gene, *rplB*, and *rpsC*. SSU rRNA gene identities are larger than *rplB* in most genomes. The diagonal dashed line is  $y = x$  and data below the line indicates the gene on X axis is more conserved. The dot intensity is the number of comparisons with those values. Subplot A, B, and C are comparisons of *rplB* and SSU rRNA gene (93,733 pairwise comparisons), *rpsC* and SSU rRNA gene (85,581 pairwise comparisons), *rplB* and *rpsC* (85,956 pairwise comparisons).

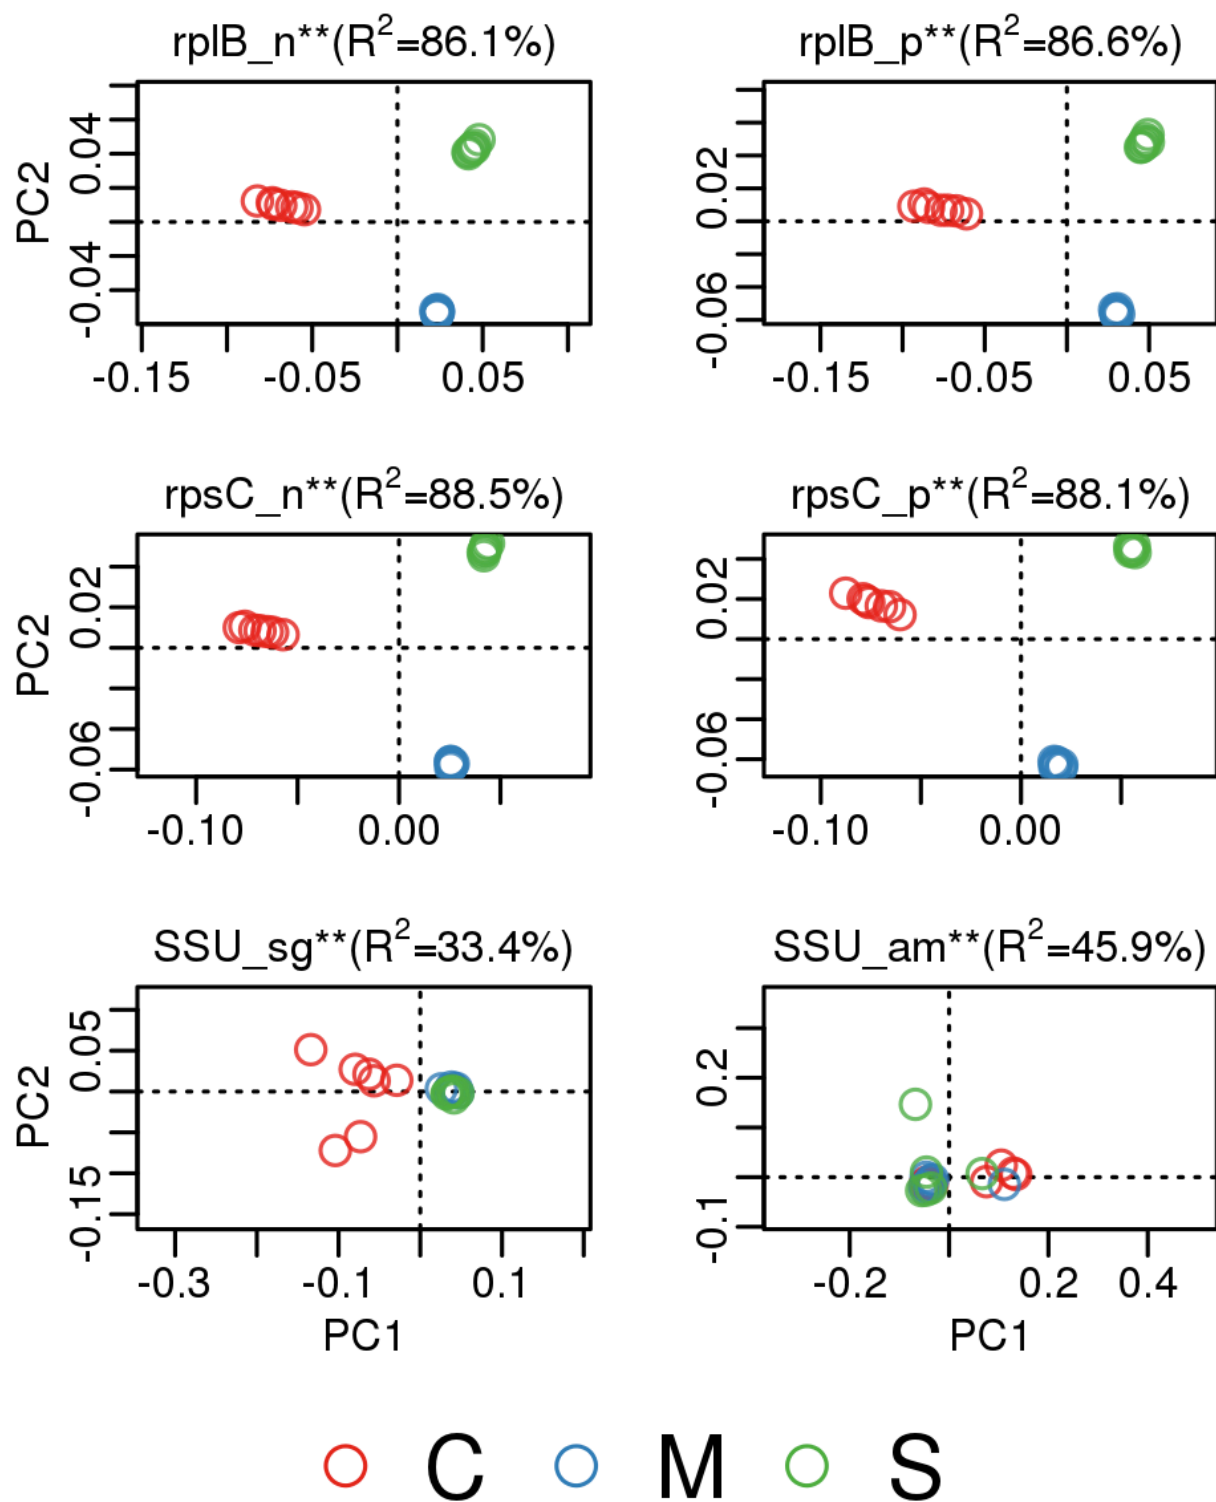

Figure 4: Comparison of the SSU rRNA gene, *rpsC* and *rplB* in beta diversity analyses (ordination) using large soil metagenome sequences from seven field replicates. All genes show that the microbial community of the corn (C) rhizosphere is significantly different from those of *Miscanthus* (M) and switchgrass (S) while *rplB* and *rpsC* at both the nucleotide (n) and protein (p) levels separate microbial communities of *Miscanthus* and switchgrass. The SSU rRNA gene does not separate *Miscanthus* and switchgrass with either shotgun (SSU.sg) or amplicon (SSU.am) data. “\*\*\*” indicates  $p < 0.01$  in PERMANOVA test.

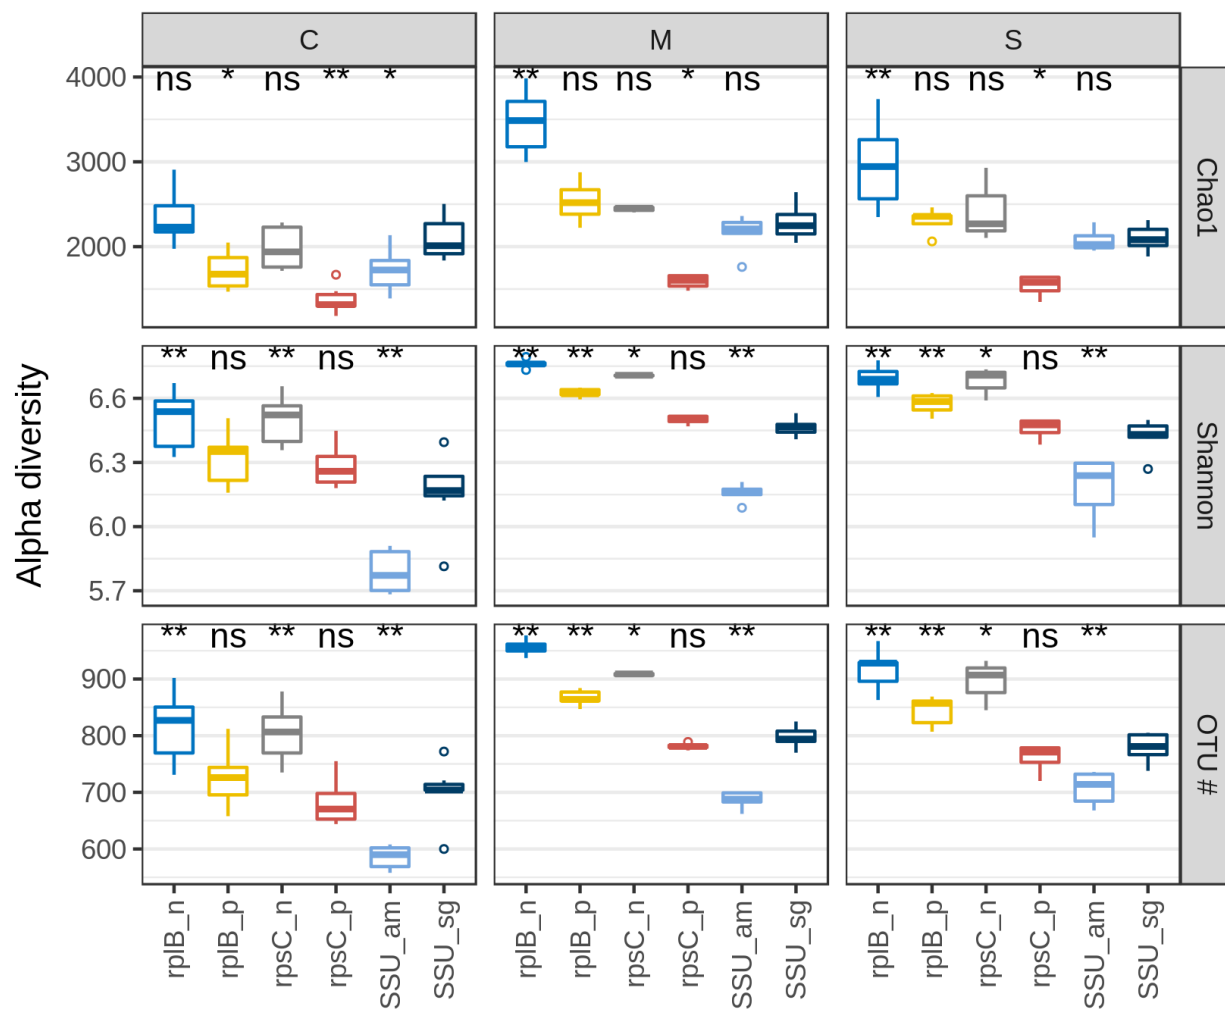

Figure 5: Comparison of the SSU rRNA gene, *rplB*, and *rpsC* in alpha diversity analyses (Chao1, Shannon, and OTU number by protein, “\_p” and nucleotide, “\_n”) using large soil metagenome sequence. All genes show that the microbial community of the corn (C) rhizosphere has significantly less alpha diversity than those of *Miscanthus* (M) and switchgrass (S) except for *rpsC* and SSU rRNA gene with Chao1 index ( $p < 0.01$ ). Wilcoxon test was used to compare SSU\_sg against each of the other genes including *rplB\_n*, *rplB\_p*, *rpsC\_n*, *rpsC\_p* and SSU\_am. For Chao1 index, *rplB\_n* and *rpsC\_n* show significantly higher abundance than SSU\_sg in *Miscanthus* and switchgrass; For Shannon index and OTU number, *rplB\_n* and *rpsC\_n* show significantly higher abundance than SSU\_sg in all three crops (“\*\*\*\*” is  $p < 0.001$ , “\*\*\*” is  $p < 0.01$ , “\*” is  $p < 0.05$ , “ns” is  $p > 0.05$ ).
